# Supplementary material for: Identification of driver genes in lupus nephritis based on comprehensive bioinformatics and machine learning
Source: PubMed Central journal article supplement (PMC10733527; doi:10.3389/fimmu.2023.1288699), 2023-12-07

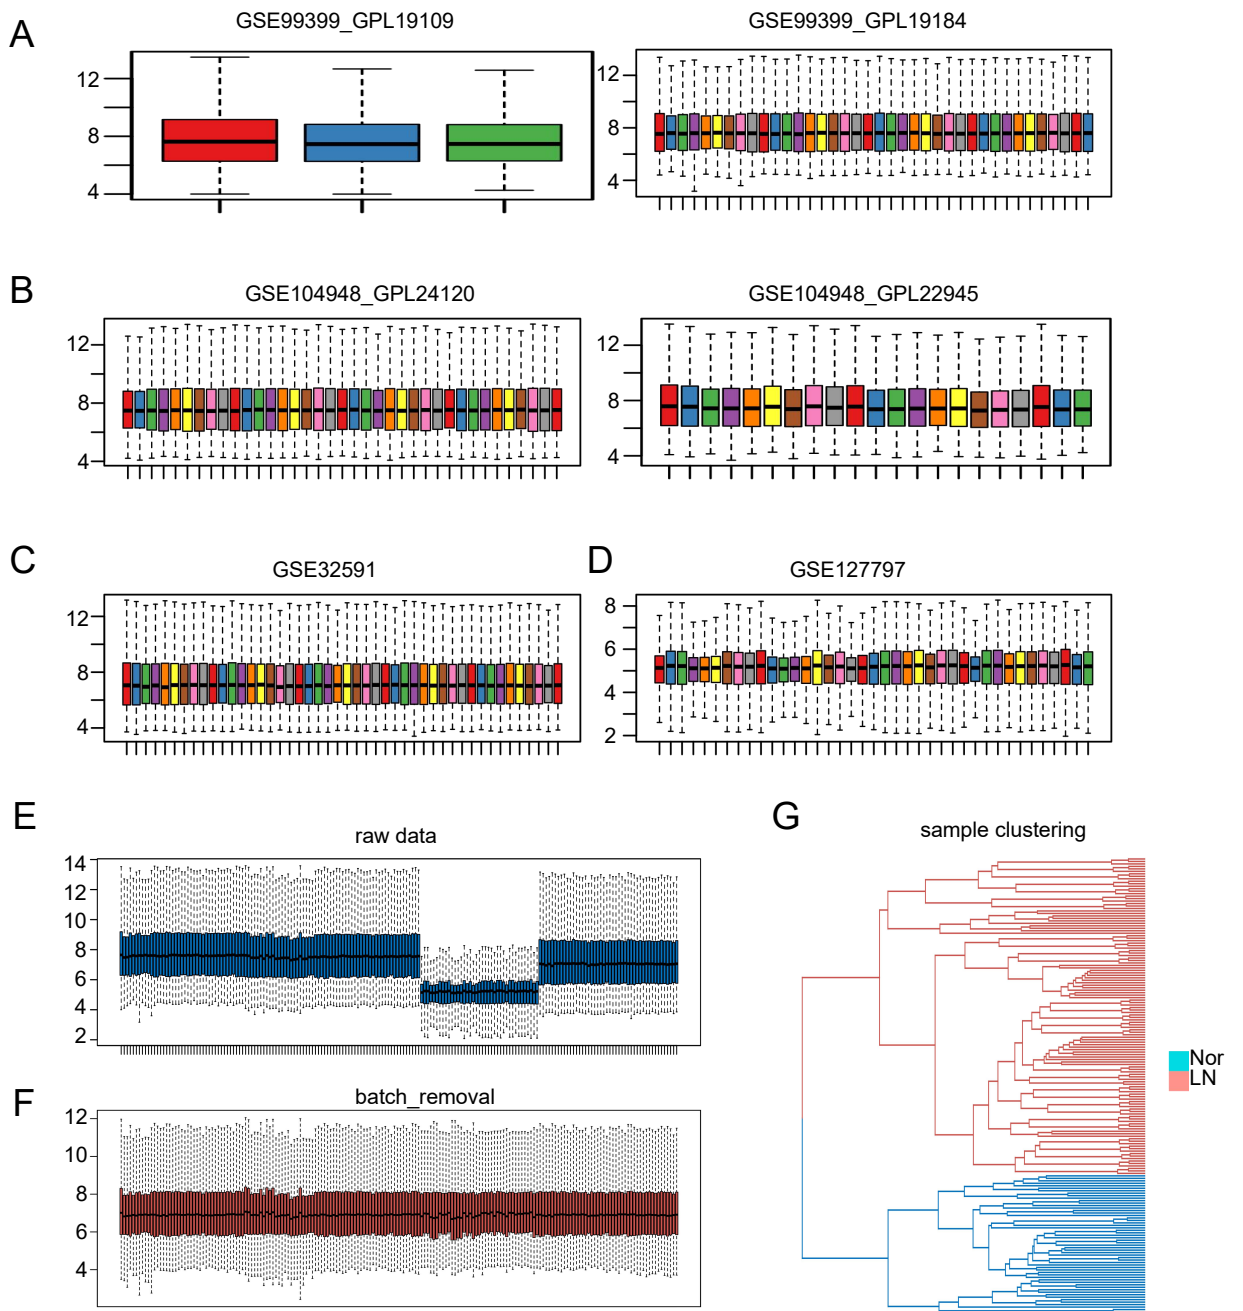

Supplement: DataSheet_1.pdf [file DataSheet_1.pdf]
